# Supplementary material for: Alanine aminotransferase controls seed dormancy in barley
Source: PubMed Central journal article supplement (PMC4873977; doi:10.1038/ncomms11625), 2016-05-18
Supplement: ncomms11625-s1.pdf [file ncomms11625-s1.pdf]

|     |                                                             |                         |                |         |      |      |     |
|-----|-------------------------------------------------------------|-------------------------|----------------|---------|------|------|-----|
|     | 10                                                          | 20                      | 30             | 40      | 50   | 60   |     |
|     | ATGTCGTACAACAAGA                                            | CCGCTCCATCACCGCCGAGACCA | TAAACCCCAAGGTC | CAAGATC |      |      |     |
| 1   | M S Y N K T A S I T A E T I N P K V K I                     |                         |                |         |      |      | 20  |
|     | 70                                                          | 80                      | 90             | 100     | 110  | 120  |     |
|     | TTCGACTACGAGCCCTGCGGGGAGATCGCCAGGCACGCGAGCGGTTGGAGCAGGAGATG |                         |                |         |      |      |     |
| 21  | F D Y E P C G E I A R R H A E R L E Q E M                   |                         |                |         |      |      | 40  |
|     | 130                                                         | 140                     | 150            | 160     | 170  | 180  |     |
|     | GAGAAAGCCAGGTTCTCGCCCTTCCAGAGATTATACTGCAACCTTGGGAAACCT      |                         |                |         |      |      |     |
| 41  | E K S P G S R P F P E I I Y C N L G N P                     |                         |                |         |      |      | 60  |
|     | 190                                                         | 200                     | 210            | 220     | 230  | 240  |     |
|     | CAGGCTCTCGGGCAGCGCCGATAAACCTTCTTGTGAGGTTATTTCTGTGTGACAAT    |                         |                |         |      |      |     |
| 61  | Q A L G Q R P I T F F R E V I S L C D N                     |                         |                |         |      |      | 80  |
|     | 250                                                         | 260                     | 270            | 280     | 290  | 300  |     |
|     | CCAGCTCTCCTCGACAGAGATGAACCCGATGTTATTCAGTCCATGTGCCATAAATAGA  |                         |                |         |      |      |     |
| 81  | P A L L H R D E T R M L F S P C A I N R                     |                         |                |         |      |      | 100 |
|     | 310                                                         | 320                     | 330            | 340     | 350  | 360  |     |
|     | GCGCGAAGATTATCGAGTCGATGCCCGAAGAACAACCGGTGCATATACCAACAGTCAG  |                         |                |         |      |      |     |
| 101 | A R K I I E S M P G R N T G A Y T N S Q                     |                         |                |         |      |      | 120 |
|     | 370                                                         | 380                     | 390            | 400     | 410  | 420  |     |
|     | GGAAATCGAAGTTTGCAGAGCGGTTGCAAGTGGAAATCGCTGCAAGAGATGGTTTTCCA |                         |                |         |      |      |     |
| 121 | G I R S L R E A V A S G I A A R D G F P                     |                         |                |         |      |      | 140 |
|     | 430                                                         | 440                     | 450            | 460     | 470  | 480  |     |
|     | TCAAAGCCGGAAGACATCTTCTGACGGATGGAAGAGATTGAGGATCAATTTGAGTATG  |                         |                |         |      |      |     |
| 141 | S R P E D I F L T D G A S S A I N L S M                     |                         |                |         |      |      | 160 |
|     | 490                                                         | 500                     | 510            | 520     | 530  | 540  |     |
|     | CAGATCTCATTAGGTCGAGAGATGGCATTATTGCCCCTTACCCGAATATCCATTA     |                         |                |         |      |      |     |
| 161 | Q I L I R S Q E D G I L C P L P E Y P L                     |                         |                |         |      |      | 180 |
|     | 550                                                         | 560                     | 570            | 580     | 590  | 600  |     |
|     | TACTCGCGTCCATTACTTACTGATGGGACTATGGTACCGTACAATCTTAGCGAGGAT   |                         |                |         |      |      |     |
| 181 | Y S A S I I L H G G T M V P Y N L S E D                     |                         |                |         |      |      | 200 |
|     | 610                                                         | 620                     | 630            | 640     | 650  | 660  |     |
|     | GGTATTGGGGCTTGAAGATTTTGGAAATAAGAGGTGCTTGGAGGAGCACGCATCGCA   |                         |                |         |      |      |     |
| 201 | G D W G L E I F E V K R C L E E A R I A                     |                         |                |         |      |      | 220 |
|     | 670                                                         | 680                     | 690            | 700     | 710  | 720  |     |
|     | GGTTTGACTGTTCTGTGATGATGATATAAATCCCGGAAACCCAAACGGGACAGGTACTG |                         |                |         |      |      |     |
| 221 | G L T V R A M V I I N P G N P T G Q V L                     |                         |                |         |      |      | 240 |
|     | 730                                                         | 740                     | 750            | 760     | 770  | 780  |     |
|     | TCTGTCCAACCGAGGAGATAGTAAATTTGTGCGAAAGAAGGCTTGGTTATCCTT      |                         |                |         |      |      |     |
| 241 | S V T N Q E E I V E F C R K E G L V I L                     |                         |                |         |      |      | 260 |
|     | 790                                                         | 800                     | 810            | 820     | 830  | 840  |     |
|     | GCCGATGAGGTATACCAAGATAATGTCTATGTGGAGGATAAGAAAGTCAATCTTCAAG  |                         |                |         |      |      |     |
| 261 | A D E V Y Q D N V Y V E D R K F N S F K                     |                         |                |         |      |      | 280 |
|     | 850                                                         | 860                     | 870            | 880     | 890  | 900  |     |
|     | AAAAGTGCAGATCACTTGGGTGTCAGCAGAAATGACATCTCCATAGTGTCAATTCATCG |                         |                |         |      |      |     |
| 281 | K V A R S L G C D E N D I S I V S F H S                     |                         |                |         |      |      | 300 |
|     | 910                                                         | 920                     | 930            | 940     | 950  | 960  |     |
|     | GTTTCGATGGGTACTCTGGAGAATGTGGCAGAGAGGGGAGGCTACATGGAGATATGGT  |                         |                |         |      |      |     |
| 301 | V S M G Y S G E C G R R G G Y M E I C G                     |                         |                |         |      |      | 320 |
|     | 970                                                         | 980                     | 990            | 1000    | 1010 | 1020 |     |
|     | TTTGGAGATGATGTGATGGGTGAGATTGCAAGGTGGCTTCTGTGACTCTTGGCCCAAC  |                         |                |         |      |      |     |
| 321 | F G D D V M G E I R K V A S V T L C P N                     |                         |                |         |      |      | 340 |
|     | 1030                                                        | 1040                    | 1050           | 1060    | 1070 | 1080 |     |
|     | ACAAGTGGTCAAATTTACTAGCCTTGGAGATGGATCCACCAAAGTCAAGATGGTGT    |                         |                |         |      |      |     |
| 341 | T N G Q I L T S L A M D P P K L G D G C                     |                         |                |         |      |      | 360 |
|     | 1090                                                        | 1100                    | 1110           | 1120    | 1130 | 1140 |     |
|     | TTCGAGGCTTTCATGGCTGAAAAGAAAGAAcCAGTACATCTTGGCCAAAGCGCCCAAG  |                         |                |         |      |      |     |
| 361 | F E A F M A E K E E T S T S L A K R A K                     |                         |                |         |      |      | 380 |
|     | 1150                                                        | 1160                    | 1170           | 1180    | 1190 | 1200 |     |
|     | ACCTTGGTGAACGATTCAGCAGCCTGGAGGGAATGACCTGCAACAAAGTAAAGGGCGCA |                         |                |         |      |      |     |
| 381 | T L V N A F S S L E G M T C N K V E G A                     |                         |                |         |      |      | 400 |
|     | 1210                                                        | 1220                    | 1230           | 1240    | 1250 | 1260 |     |
|     | ATCTACGCCCTCCACGATCCATCTCCAGCAAGCGGCAACAAGCCGCAAGGCGGAG     |                         |                |         |      |      |     |
| 401 | I Y A F P R I H L P A A A I K A A K A E                     |                         |                |         |      |      | 420 |
|     | 1270                                                        | 1280                    | 1290           | 1300    | 1310 | 1320 |     |
|     | GACaTGTCCCGAGACGTTCTACGCGTGGCGTCTTCTCGATGCCACCGGAATCGCGTTC  |                         |                |         |      |      |     |
| 421 | D M S P D T F Y A C R L L D A T G I A V                     |                         |                |         |      |      | 440 |
|     | 1330                                                        | 1340                    | 1350           | 1360    | 1370 | 1380 |     |
|     | GTCCTGGCTCTGGATCCACGATCTCTGGCGCAACAAGCGGACCGGAGATGGCAT      |                         |                |         |      |      |     |
| 441 | V P G S G F H Q I S G R N T A T G T W H                     |                         |                |         |      |      | 460 |
|     | 1390                                                        | 1400                    | 1410           | 1420    | 1430 | 1440 |     |
|     | ATCAGGTGACTATCCTTGTGCGCGAGGACAAAGATCGAGGCAATGATCGCGGCTCAAG  |                         |                |         |      |      |     |
| 461 | I R C T I L V A E D K I E A M I A R L K                     |                         |                |         |      |      | 480 |
|     | 1450                                                        | 1460                    | 1470           | 1480    |      |      |     |
|     | GCCTCCACGAGTCTTCATGAAAGAGTTCCGCGACCCGAAAGCTGA               |                         |                |         |      |      |     |
| 481 | A F H E S F M N E F R D R S *                               | 495                     |                |         |      |      |     |

**Supplementary Fig. 1| Nucleotide and amino acid sequences of *qsdl* in dormant wild barley H602.**

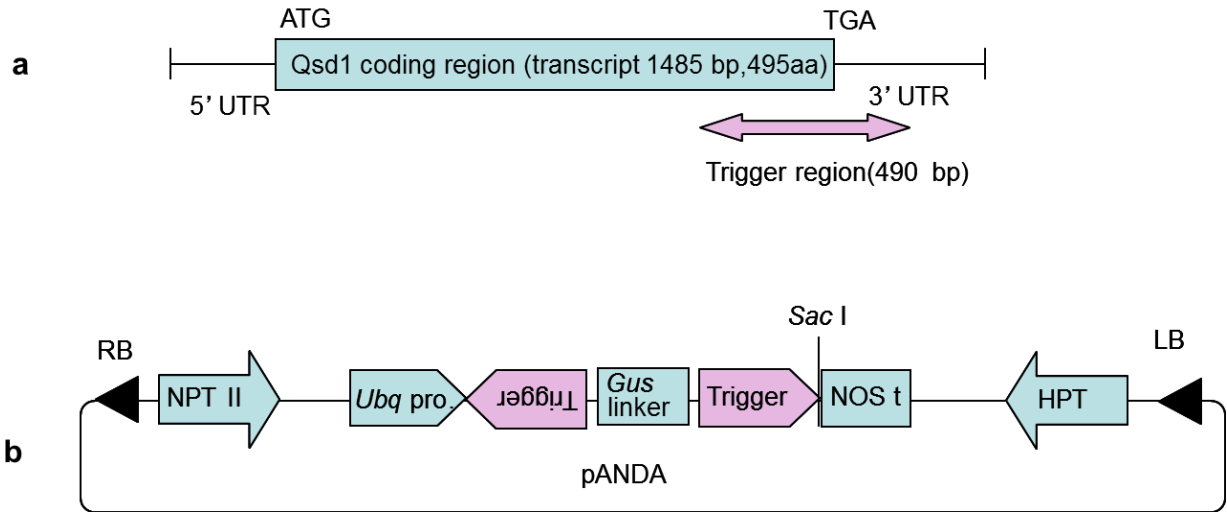

**Supplementary Fig. 2 | RNAi knockdown construct of *Qsd1*. a, Trigger region, b, RNAi trigger vector; pANDA.**

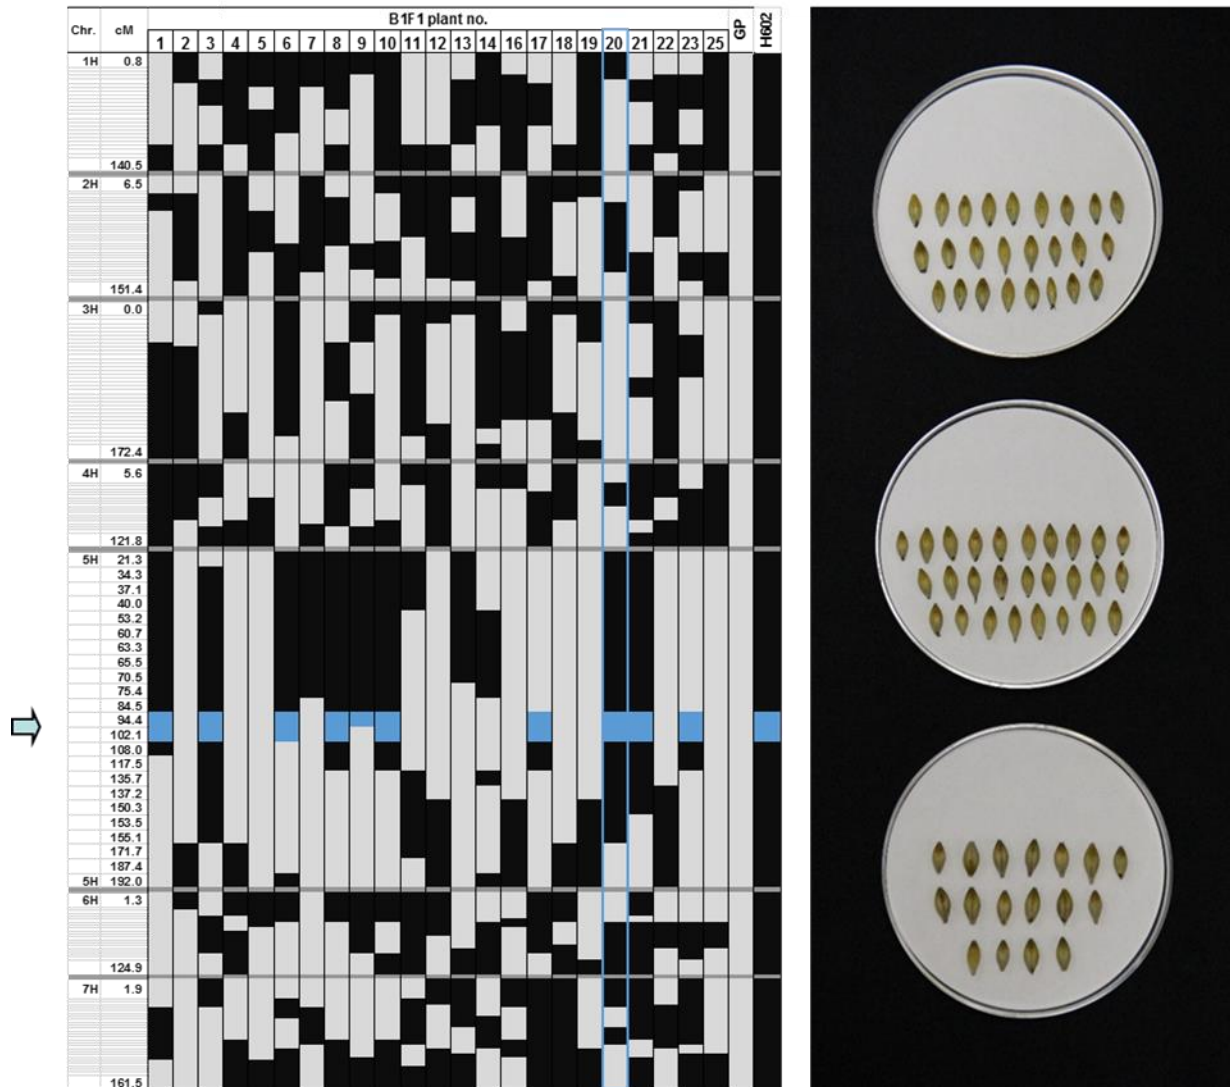

**Supplementary Fig. 3 | Genotyping and selection of B<sub>1</sub>F<sub>1</sub> plants derived from the cross between GP (Golden Promise: transformation efficient with less dormant allele *Qsd1/Qsd1*) and H602 (transformation inefficient with dormant allele *qsd1/qsd1*).** Left: Black box indicates heterozygous region of B<sub>1</sub>F<sub>1</sub> plants on the background of GP (gray box). *Qsd1* region is indicated by arrow in blue region of each plant. The B<sub>1</sub>F<sub>1</sub> plant No.20 (blue line) was self-pollinated to obtain a B<sub>1</sub>F<sub>2</sub> *qsd1/qsd1* homozygous plant (B<sub>1</sub>H<sub>602</sub>GP20-7). Right: Seed samples of B<sub>1</sub>H<sub>602</sub>GP20-7 (each spike for each Petri dish) show no germination after 35 d of 25°C dormancy reduction treatment.

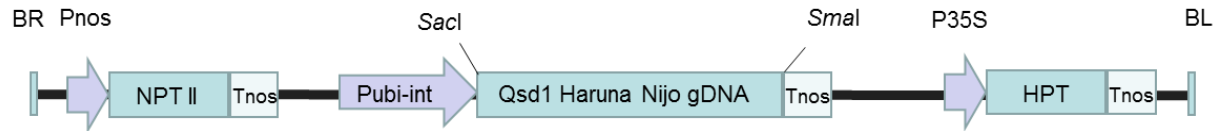

**Supplementary Fig. 4| T-DNA region of pBUH3.** Abbreviations are as follows: BR, right border; BL, left border; NPT II, neomycin; Phosphotransferase II; Pnos, nopaline synthase promoter; Tnos, 3' signal of nopaline synthase; P35S, 35S promoter; Pubi-int, maize ubiquitin promoter and the first intron; HPT, hygromycin phosphotransferase.

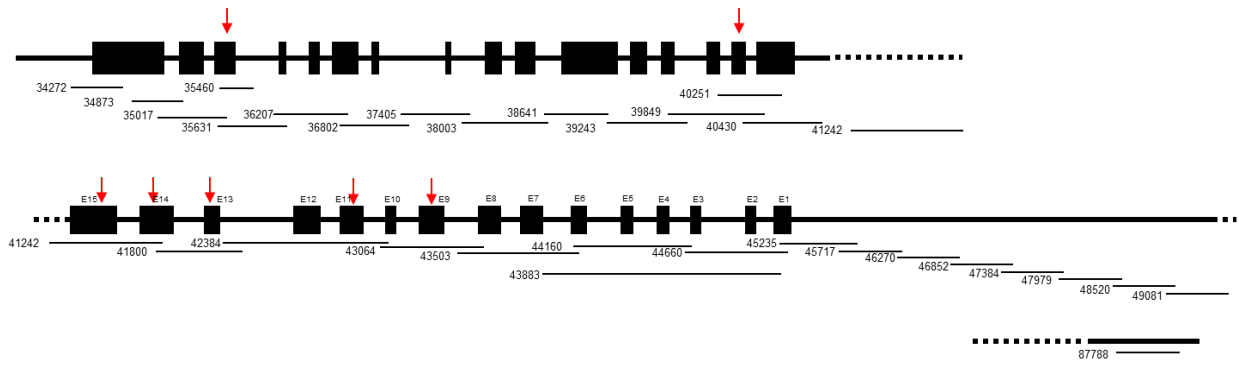

**Supplementary Fig. 5| PCR amplification at the region of *LC054176* (upper) and *Qsd1* (lower). Arrows indicate SNPs in exon between parents (Haruna Nijo and H602).**

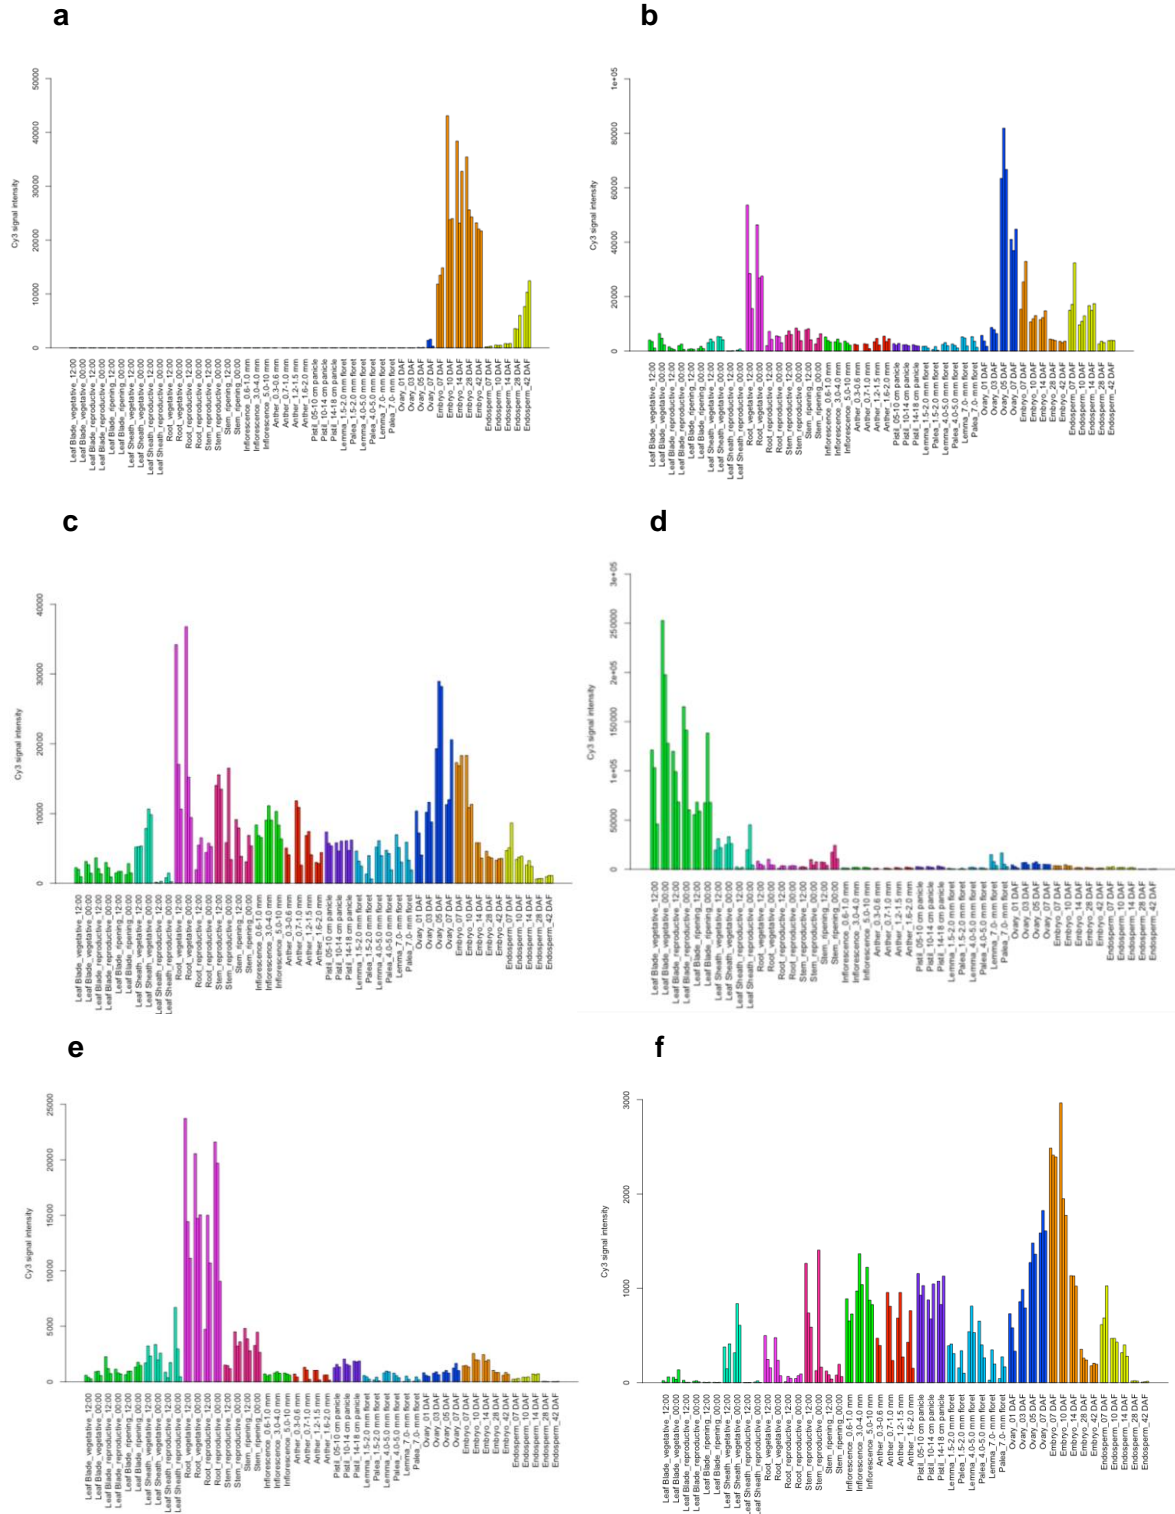

**Supplementary Fig. 6 | Expression patterns of AlaAT rice orthologs.** Rice genes and barley orthologs in parenthesis of **a**, *Os09g043390* (*Qsd1*), **b**, *Os10g039050* (*Hv3*), **c**, *Os07g061780* (*Hv2*), **d**, *Os07g010830* (*Hv5*) and **e** and **f**, *Os10g039060* (*Hv4*). *Os10g039060* has two probes from full length cDNA AK119373 (e) and AK107029 (f) which might be derived from a different locus in RiceXPro<sup>23</sup>.

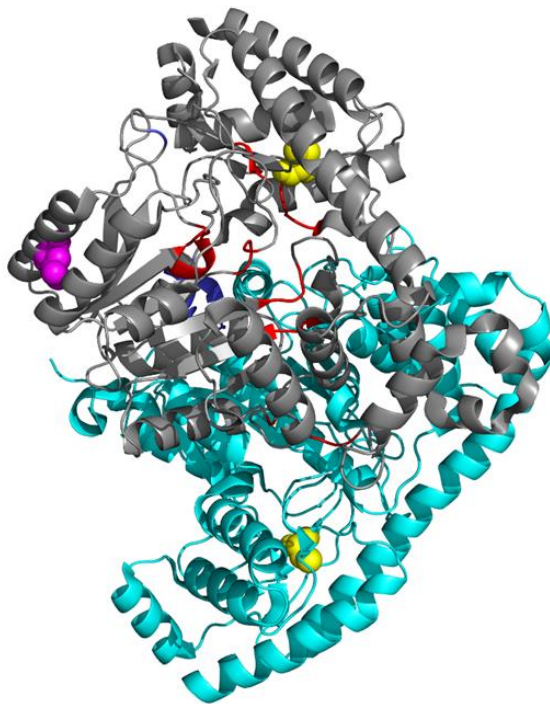

**Supplementary Fig. 7 | An *in silico* protein threaded model of QSD1 based on the crystal structure of AlaAT<sup>24</sup> (Hv3).** The model contains two subunits, coloured grey and cyan. The predicted position of the L214F substitution is shown in magenta. The NH<sub>2</sub>-terminus is shown in blue, the pyridoxal 5' phosphate binding pocket is in red, and cysteines are shown in yellow.

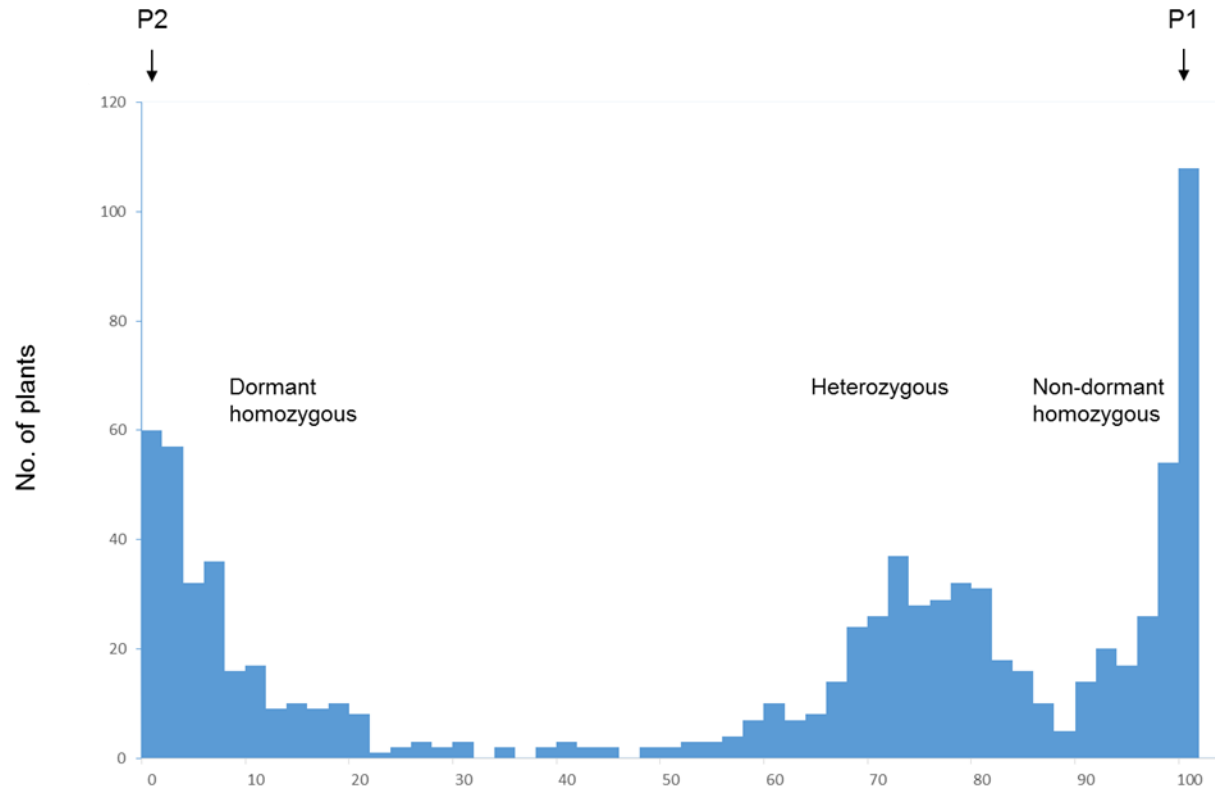

**Supplementary Fig. 8| Frequency distribution of seed germination % in F<sub>3</sub> plants (F<sub>4</sub> seeds) from the cross Haruna Nijo (P1)/H602 (P2) after 28 d treatment of dormancy reduction. *Qsd1/qsd1* is genotyped by dormant homozygous, heterozygous and non-dormant homozygous.**



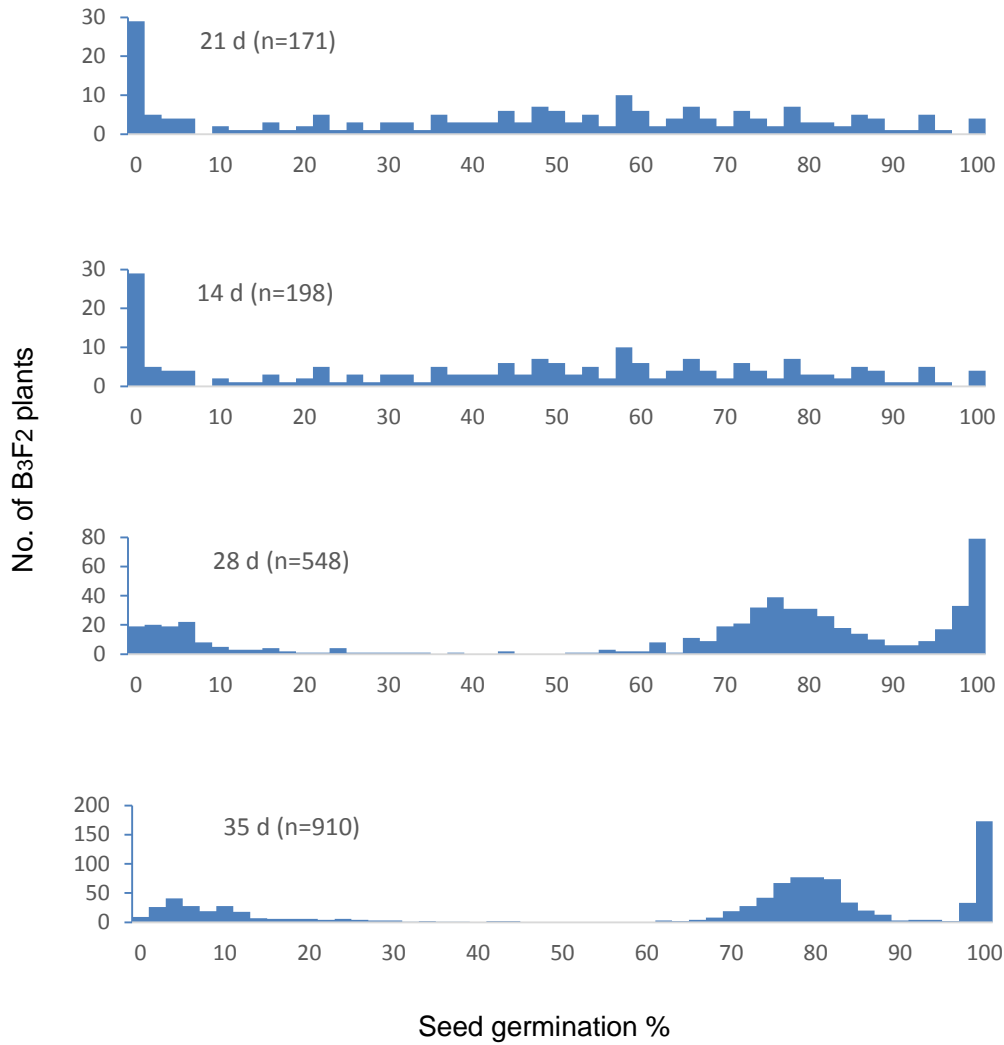

**Supplementary Fig. 9| Frequency distributions of seed germination in F<sub>2</sub> plants (F<sub>3</sub> seeds) from the cross Haruna Nijo/H602 for time course treatments of dormancy reduction.**

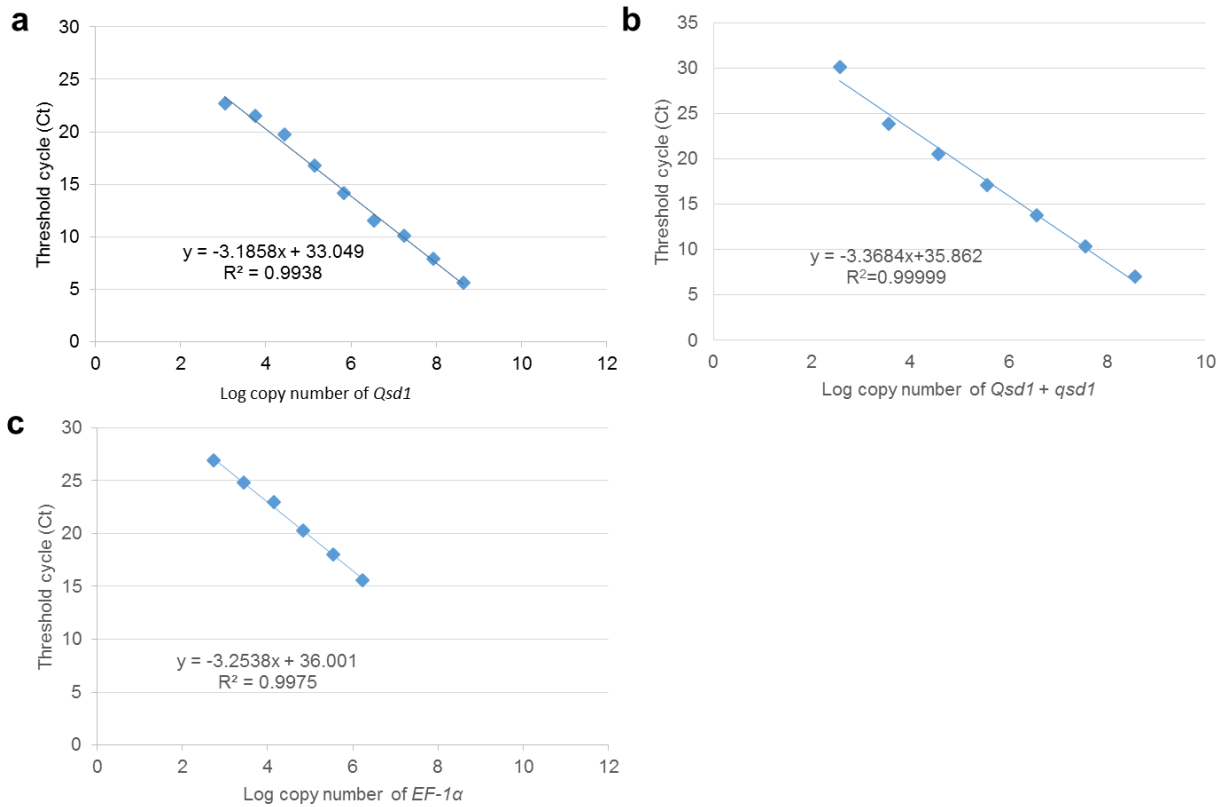

**Supplementary Fig. 10| Log copy numbers for expression data.** Each figure represents the expression for **a**, *qsd1* (H602), **b**, *Qsd1* and *qsd1* for complementation experiment and **c**, *EF1-α* as a control. For primer sequences, see Supplementary Table 8.

**Supplementary Table 1| Primer information of markers for fine mapping of *Qsd1* region.**

| Primer name | sequence ID       | sequence L            | sequence R            |
|-------------|-------------------|-----------------------|-----------------------|
| EST1        | k01353*           | GCAACCGTAGTCCTTGTGGT  | GTGTGGCCTTTCAGGTGATT  |
| EST2        | k04618*           | ATCAGGCATATGACCCAAGG  | AGGGAAATGGTGCACAAGAC  |
| EST3        | NIASHv3083L11_R** | CCGCTCCCAAGAGTATTTT   | GTTGCTAATCTCCCCGTTGT  |
| EST4R       | k00950*           | ACTACAAAAGCCTTCCCCGT  | TGCGAAACCATACCGTAACA  |
| EST4F       | FLOUba96g05_F     | GTCCAATTCCCCACCACA    | GCACGCAGCTCCTTGACA    |
| EST5        | NIASHv3013O02_F** | CAATCGCTCACTCTCCTCCT  | TTCCGGTCTTGATGGAAAAC  |
| EST6        | CONTIG7699***     | GTCGTCCTGAAGCAGATGGT  | AACATGCACCCTACTTCAACG |
| EST7        | NIASHv1145B20_R** | TACACTTCCGTGGCACAATC  | GACGACGTGTACCTCGGCTA  |
| EST8        | NIASHv3118E04_R** | ATCACGGCAGGTGGTACAG   | GTGTACCTCGGCTACGGCTA  |
| EST9        | NIASHv2005F14_F** | TTGCATTTCTGTTCTCCAGTG | CATGAGCTACTGCACGTTCC  |
| EST10       | NIASHv3091J11_F** | CGCCCAACTAGCTAAAAACAG | CGACAGCGACTTCACGTCT   |
| EST11       | rbah40i16****     | GAGATCAATGACGTGCTCCA  | TGGGGAAGTTGTGTTGGAAT  |
| EST12       | k03227*           | TGATTGTTACGTTGCCTGGA  | CATGCCACATAATGCAAAGG  |

\* Sato *et al.*<sup>13</sup>

\*\* bex-db (<http://barleyflc.dna.affrc.go.jp/bexdb/>)

\*\*\* HarvEST (<http://harvest.ucr.edu/>) barley assembly #32

\*\*\*\* Barley DB (<http://www.shigen.nig.ac.jp/barley/>)

**Supplementary Table 2 | Nucleotide polymorphisms in the *Qsd1* region.** Gene structures of *AK353915* and *LC054176* are tail-to-tail oriented to and separated only by 345 bp. Polymorphisms are indicated with E: exon and I: intron numbers and position refer to the Haruna Nijo BAC sequence (LC054174). NS show non synonymous amino acid change. Dormant and less-dormant parents used for QTL mapping<sup>9</sup> are compared.

|                                            |          |              | Gene structure of <i>LC054176</i>           |       |       |       |       |       |       |       |       |       |       |        |       |       |       | Intergenic |       | Gene structure of <i>AK372829</i> |       |       |       |       |       |       |       |       |       |       |       |       |       |       |       |       |       |       |              |       |       |              |              |       |       |       |       |       |       |       |       |       |       |       |       |       |       |       |     |   |   |   |   |    |   |    |   |   |   |   |    |   |   |   |
|--------------------------------------------|----------|--------------|---------------------------------------------|-------|-------|-------|-------|-------|-------|-------|-------|-------|-------|--------|-------|-------|-------|------------|-------|-----------------------------------|-------|-------|-------|-------|-------|-------|-------|-------|-------|-------|-------|-------|-------|-------|-------|-------|-------|-------|--------------|-------|-------|--------------|--------------|-------|-------|-------|-------|-------|-------|-------|-------|-------|-------|-------|-------|-------|-------|-------|-----|---|---|---|---|----|---|----|---|---|---|---|----|---|---|---|
| E:exon, I:intron                           |          |              | E3                                          | I3    | I3    | I3    | I5    | E6    | I6    | I7    | I7    | I7    | I8    | I10    | I10   | E11   | I11   | I11        | E12   | I12                               | I13   | I13   | I13   | I14   | E15   |       |       | E15   | E15   | E15   | I14   | I4    | E14   | I13   | E13   | I12   | I12   | E11   | E9           | I8    | E8    | I6           | I5           | I5    | I3    | I2    | I2    | I2    | I2    | I2    | I1    |       |       |       |       |       |       |       |     |   |   |   |   |    |   |    |   |   |   |   |    |   |   |   |
| Position on Haruna Nijo BAC clone LC054174 |          |              | 35654                                       | 35781 | 35812 | 36006 | 36032 | 36633 | 36795 | 36918 | 37510 | 37530 | 37762 | 377942 | 38684 | 38693 | 39301 | 39440      | 39451 | 39487                             | 39558 | 39731 | 39954 | 40066 | 40086 | 40269 | 40272 | 40407 | 40947 | 41105 | 41169 | 41331 | 41480 | 41535 | 41641 | 41667 | 41771 | 41916 | <b>42085</b> | 42152 | 42521 | <b>42850</b> | <b>43368</b> | 43574 | 43654 | 44044 | 44295 | 44362 | 44675 | 44791 | 44846 | 44853 | 44870 | 44879 | 44909 | 44912 | 45025 | 45109 |     |   |   |   |   |    |   |    |   |   |   |   |    |   |   |   |
| <i>Qsd1/qsd1</i>                           | Acc. No. | Name         | Non synonymous haplotype of <i>AK372829</i> |       |       |       |       |       |       |       |       |       |       |        |       |       |       |            |       |                                   |       |       |       |       |       |       |       |       |       |       |       |       |       |       |       |       |       |       |              |       |       |              |              |       |       |       |       |       |       |       |       |       |       |       |       |       |       |       |     |   |   |   |   |    |   |    |   |   |   |   |    |   |   |   |
| <i>qsd1</i>                                | H602     | Wild barley  | T                                           | G     | C     | C     | T     | A     | T     | A     | T     | T     | C     | C      | C     | T     | T     | T          | C     | T                                 | T     | C     | T     | T     | G     | T     | C     | T     | T     | C     | T     | T     | G     | T     | ---   | C     | T     | T     | G            | T     | G     | ---          | C            | G     | ---   | A     | T     | CA    | G     | -     | -     | C     | C     | C     | T     | A     | C     | C     | CT  | A | C | A | G | T  | A | TA | A | T | A |   |    |   |   |   |
| <i>qsd1</i>                                | I765     | Khanaqin 1   | T                                           | A     | C     | C     | T     | A     | T     | A     | T     | T     | C     | C      | C     | T     | T     | T          | C     | T                                 | T     | T     | C     | T     | T     | G     | T     | ---   | C     | T     | T     | G     | T     | ---   | C     | T     | T     | G     | T            | ---   | C     | T            | T            | G     | T     | G     | ---   | C     | G     | ---   | A     | T     | CA    | A     | -     | -     | C     | C     | C   | T | A | C | C | CT | A | C  | A | G | T | A | TA | A | T | A |
| <i>qsd1</i>                                | I767     | Khanaqin 7   | T                                           | A     | C     | C     | T     | A     | T     | A     | T     | T     | C     | C      | C     | T     | T     | T          | C     | T                                 | T     | T     | C     | T     | T     | G     | T     | ---   | C     | T     | T     | G     | T     | ---   | C     | T     | T     | G     | T            | ---   | C     | T            | T            | G     | T     | G     | ---   | C     | G     | ---   | A     | T     | CA    | A     | -     | -     | C     | C     | C   | T | A | C | C | CT | A | C  | A | G | T | A | TA | A | T | A |
| <i>qsd1</i>                                | T602     | Turkey 6     | T                                           | A     | C     | C     | T     | A     | T     | A     | T     | T     | C     | C      | C     | T     | T     | T          | C     | T                                 | T     | T     | C     | T     | T     | G     | T     | ---   | C     | T     | T     | G     | T     | ---   | C     | T     | T     | G     | T            | ---   | C     | T            | T            | G     | T     | G     | ---   | C     | G     | ---   | A     | T     | CA    | A     | -     | -     | C     | C     | C   | T | A | C | C | CT | A | C  | A | G | T | A | TA | A | T | A |
| <i>qsd1</i>                                | T615     | Turkey 45    | T                                           | A     | C     | C     | T     | A     | T     | A     | T     | T     | C     | C      | C     | T     | T     | T          | C     | T                                 | T     | T     | C     | T     | T     | G     | T     | ---   | C     | T     | T     | G     | T     | ---   | C     | T     | T     | G     | T            | ---   | C     | T            | T            | G     | T     | G     | ---   | C     | G     | ---   | A     | T     | CA    | A     | -     | -     | C     | C     | C   | T | A | C | C | CT | A | C  | A | G | T | A | TA | A | T | A |
| <i>qsd1</i>                                | I626     | Katana 1     | C                                           | A     | T     | C     | C     | A     | T     | G     | C     | G     | T     | C      | T     | C     | C     | ---        | C     | C                                 | T     | C     | A     | C     | C     | G     | C     | CTT   | C     | T     | C     | C     | G     | A     | G     | GA    | T     | AAC   | A            | C     | CA    | A            | C            | A     | T     | C     | C     | A     | A     | T     | TT    | G     | T     | T     | T     | C     | G     | ---   | G   | T | A |   |   |    |   |    |   |   |   |   |    |   |   |   |
| <i>qsd1</i>                                | I622     | H. E. S. 4   | C                                           | A     | T     | C     | C     | -     | T     | G     | T     | T     | C     | T      | C     | C     | C     | ---        | C     | C                                 | C     | C     | T     | A     | T     | C     | A     | T     | CTT   | C     | T     | C     | C     | T     | G     | GA    | C     | T     | AAC          | A     | C     | AT           | A            | C     | A     | T     | C     | C     | A     | C     | C     | CT    | G     | T     | T     | T     | C     | G     | --- | G | T | A |   |    |   |    |   |   |   |   |    |   |   |   |
| <i>qsd1</i>                                | C627     | Mokussekko 3 | C                                           | A     | T     | C     | C     | A     | T     | G     | T     | T     | C     | T      | C     | C     | C     | ---        | C     | C                                 | C     | C     | T     | A     | T     | C     | A     | T     | CTT   | T     | T     | C     | C     | T     | G     | GA    | T     | AAC   | G            | C     | CA    | A            | C            | A     | T     | C     | C     | A     | C     | T     | CT    | G     | T     | T     | T     | C     | G     | ---   | G   | T | A |   |   |    |   |    |   |   |   |   |    |   |   |   |
| <i>qsd1</i>                                |          | Steptoe      | C                                           | A     | T     | C     | C     | A     | C     | G     | T     | T     | C     | C      | C     | C     | ---   | C          | C     | C                                 | C     | C     | A     | T     | C     | G     | C     | TTT   | C     | T     | C     | C     | T     | G     | G     | A     | C     | T     | AAC          | A     | C     | CA           | A            | C     | A     | T     | C     | G     | C     | C     | CA    | G     | T     | T     | T     | C     | G     | ---   | G   | T | A |   |   |    |   |    |   |   |   |   |    |   |   |   |
| <i>Qsd1</i>                                |          | Morex        | C                                           | A     | T     | G     | C     | -     | T     | G     | T     | T     | C     | T      | C     | C     | C     | ---        | C     | C                                 | C     | C     | T     | A     | T     | C     | A     | T     | CTT   | C     | C     | C     | C     | T     | G     | GA    | C     | T     | AAC          | A     | C     | AT           | A            | C     | A     | T     | G     | C     | A     | C     | C     | CT    | G     | T     | T     | T     | C     | G     | --- | G | T | A |   |    |   |    |   |   |   |   |    |   |   |   |
| <i>Qsd1</i>                                | J215     | Ko A         | C                                           | A     | T     | G     | C     | -     | T     | G     | T     | T     | C     | T      | C     | C     | C     | ---        | C     | C                                 | C     | C     | T     | A     | T     | C     | A     | T     | CTT   | C     | C     | C     | C     | T     | G     | GA    | C     | T     | AAC          | A     | C     | AT           | A            | C     | A     | T     | G     | C     | A     | C     | C     | CT    | G     | T     | T     | T     | C     | G     | --- | G | T | A |   |    |   |    |   |   |   |   |    |   |   |   |
| <i>Qsd1</i>                                | U062     | Russia 6     | C                                           | A     | T     | G     | C     | -     | T     | G     | T     | T     | C     | T      | C     | C     | C     | ---        | C     | C                                 | C     | C     | T     | A     | T     | C     | A     | T     | CTT   | C     | C     | C     | C     | T     | G     | GA    | C     | T     | AAC          | A     | C     | AT           | A            | C     | A     | T     | G     | C     | A     | C     | C     | CT    | G     | T     | T     | T     | C     | G     | --- | G | T | A |   |    |   |    |   |   |   |   |    |   |   |   |
| <i>Qsd1</i>                                | C649     | Harbin 2-row | C                                           | A     | T     | G     | C     | -     | T     | G     | T     | T     | C     | T      | C     | C     | C     | ---        | C     | C                                 | C     | C     | T     | A     | T     | C     | A     | T     | CTT   | C     | C     | C     | C     | T     | G     | GA    | C     | T     | AAC          | A     | C     | AT           | A            | C     | A     | T     | G     | C     | A     | C     | C     | CT    | G     | T     | T     | T     | C     | G     | --- | G | T | A |   |    |   |    |   |   |   |   |    |   |   |   |
| <i>Qsd1</i>                                | J247     | Haruna Nijo  | C                                           | A     | T     | G     | C     | -     | T     | G     | T     | T     | C     | T      | C     | C     | C     | ---        | C     | C                                 | C     | C     | T     | A     | T     | C     | A     | T     | CTT   | C     | C     | C     | C     | T     | G     | GA    | C     | T     | AAC          | A     | C     | AT           | A            | C     | A     | T     | G     | C     | A     | C     | C     | CT    | G     | T     | T     | T     | C     | G     | --- | G | T | A |   |    |   |    |   |   |   |   |    |   |   |   |
|                                            |          |              |                                             |       |       |       |       |       |       |       |       |       |       |        |       |       |       |            |       | NS NS NS NS                       |       |       |       |       |       |       |       |       |       |       |       |       |       |       |       |       |       |       |              |       |       |              |              |       |       |       |       |       |       |       |       |       |       |       |       |       |       |       |     |   |   |   |   |    |   |    |   |   |   |   |    |   |   |   |

**Supplementary Table 3| Degree of less-dormancy (% of germination) of mapping parents used for QTL detection and additive effects of *Qsd1* in each population<sup>9</sup>.**

| Name          | Accession No. | Allele      | Non-synonymous SNP |     |     |    | Germination (%) after 25°C treatment |     | Additive effect of <i>Qsd1</i> allele (germination %) |      | Cross and <i>Qsd1</i> donor |
|---------------|---------------|-------------|--------------------|-----|-----|----|--------------------------------------|-----|-------------------------------------------------------|------|-----------------------------|
|               |               |             | E14                | E13 | E11 | E9 | 5w                                   | 10w | 5w                                                    | 10w  |                             |
|               |               |             |                    |     |     |    |                                      |     |                                                       |      |                             |
| Wild barley   | H602          | <i>qsd1</i> | T                  | G   | C   | C  | 0                                    | 0   | 15.8                                                  | 26.5 | J247/H602                   |
| Khanaqin 1    | I765          | <i>qsd1</i> | T                  | A   | C   | C  | 0                                    | 1   | 48.1                                                  | 23.6 | C649/I765                   |
| Khanaqin 7    | I767          | <i>qsd1</i> | T                  | A   | C   | C  | 0                                    | 0   | 46.2                                                  | 42.5 | C649/I767                   |
| Turkey 6      | T602          | <i>qsd1</i> | T                  | A   | C   | C  | 0                                    | 0   | 32.3                                                  | 44.9 | C649/T602                   |
| Turkey 45     | T615          | <i>qsd1</i> | T                  | A   | C   | C  | 0                                    | 0   | 29.8                                                  | 45.7 | C649/T615                   |
| Katana 1      | I626          | <i>qsd1</i> | C                  | A   | T   | C  | 12                                   | 24  | 13.1                                                  | 10.6 | C649/I626                   |
| H. E. S. 4    | I622          | <i>qsd1</i> | C                  | A   | T   | C  | 27                                   | -   | 11.4                                                  | -    | U602/I622                   |
| Mokussekkko 3 | C627          | <i>qsd1</i> | C                  | A   | T   | C  | 4                                    | -   | 27.5                                                  | -    | J215/C627                   |
| Ko A          | J215          | <i>Qsd1</i> | C                  | A   | T   | G  | 91                                   | -   | 0                                                     | -    | J215                        |
| Russia 6      | U062          | <i>Qsd1</i> | C                  | A   | T   | G  | 93                                   | -   | 0                                                     | -    | U062                        |
| Harbin 2-row  | C649          | <i>Qsd1</i> | C                  | A   | T   | G  | 100                                  | 100 | 0                                                     | 0    | C649                        |
| Haruna Nijo   | J247          | <i>Qsd1</i> | C                  | A   | T   | G  | 100                                  | 100 | 0                                                     | 0    | J247                        |

**Supplementary Table 4| Association between haplotypes of non-synonymous SNPs in *Qsd1/qsdl* and average seed germination among 353 cultivated and 14 wild barley accessions.**

| Non-synonymous SNP |     |     |    | Wild |   | Cultivated |     | Reference   |
|--------------------|-----|-----|----|------|---|------------|-----|-------------|
| E14                | E13 | E11 | E9 | %*   | n | %*         | n   |             |
| T                  | G   | C   | C  | 0.0  | 1 |            |     | H602        |
| T                  | A   | C   | C  | 1.5  | 4 | 5.5        | 4   |             |
| C                  | A   | C   | C  |      |   | 40.6       | 7   |             |
| C                  | A   | T   | C  | 0.0  | 6 | 56.2       | 235 |             |
| T                  | A   | T   | C  | 0.0  | 3 | 62.0       | 61  |             |
| C                  | A   | C   | G  |      |   | 80.1       | 17  |             |
| C                  | A   | T   | G  |      |   | 83.0       | 29  | Haruna Nijo |

\*Average germination % after 35 d of 25°C dormancy reduction treatment

**Supplementary Table 5| Primer information for polymorphism detection on *QsdI* region.**  
Position is based on the numbers from 3' end of Haruna Nijo BAC clone (LC054174).

| Primer name | Position on BAC clone LC054174 | Product size | Sequence L                | Sequence R                  |
|-------------|--------------------------------|--------------|---------------------------|-----------------------------|
| 34272       | 34272 - 34778                  | 507          | CCCGAAATCCCGTCTAGTCT      | AAGATAGAAGCCGACCAAACC       |
| 34873       | 34873 - 35372                  | 500          | GTCCAATCCCCACCACA         | GCACGCAGCTCCTTGACA          |
| 35017       | 35017 - 35698                  | 698          | CTTCTCCCCACGCTTACT        | ACGAGCGAACCAATCTCCT         |
| 35460       | 35460 - 35974                  | 515          | CGTCCTATCCGTTTCCTGAG      | TGGACAAGTTTCTTCAGATTCA      |
| 35631       | 35631 - 36300                  | 670          | GTCGTGCAACCCAATTCTT       | TGCAAAGAATAATGTGTCTACCTTT   |
| 36207       | 36207 - 36836                  | 656          | TGGCTTGTTATAACACAGGTCTAT  | ATATCTTTATGGCTGGGGACA       |
| 36802       | 36802 - 37446                  | 671          | GAAATGGCTGAGGAAGAAGG      | AACTGAGTGAACTCAATCTGTGTATCT |
| 37405       | 37405 - 38071                  | 691          | CATGATGTGCGGCACTAAC       | TTGGGAGCAGAAAAGAACTG        |
| 38003       | 38003 - 38682                  | 682          | GAGCCTTTGTTGGTAGAGTTGC    | CATGCATAAACAATGCGAATAGA     |
| 38641       | 38641 - 39330                  | 690          | TTGCCATCGCTTGTTACT        | GAGATGGCCCTGAAGTTGAT        |
| 39243       | 39243 - 39935                  | 693          | CCAAACTTGCCATCTGCTC       | CCCTTAGTTCCTCAGCATTGA       |
| 39849       | 39849 - 40530                  | 690          | ATGACCGTACGTATCCACTATTCA  | CATCTGTCTTCGCGTAATCCT       |
| 40251       | 40251 - 40763                  | 513          | TTTGCTTTGTCACAGGTTG       | AAAAGCCTTCCCCGTCTCTA        |
| 40430       | 40430 - 41086                  | 657          | TGGGCACTTTCAAGGTAATAA     | CAAACTGAGGTCAATGTACCG       |
| 41242       | 41242 - 41866                  | 625          | GGGAGGCACTCACTCAGTACA     | AGGGAATGACCTGCAACAAA        |
| 41800       | 41800 - 42337                  | 538          | GCTGCTGGGAGATGGATG        | CCCCTGTTTCGCATACTTG         |
| 42384       | 42384 - 43138                  | 755          | TGCAGCAAAAGTCAACAAGG      | TCGGAAAGAAGGCTTGGTTA        |
| 43064       | 43064 - 43656                  | 593          | CGCCCGCGTCACAAAACACTAC    | GGTGGGACTATGGTATGGTGG       |
| 43503       | 43503 - 44194                  | 692          | ACGCACTCCCACTTTACACC      | ATTGCAGTCCATGTGCCATA        |
| 43883       | 43883 - 45247                  | 1364         | CGCCACCTTAGCTAGCTCTC      | ATGTCTTCCGGTCTTGATGG        |
| 44160       | 44160 - 44722                  | 563          | CTTCCGCGCTCTATTTATGG      | CCAGAGGTGCGTCTTTCTTT        |
| 44660       | 44660 - 45294                  | 635          | GCTCTGGAAGTCTGGGTTGA      | CAGCACAATCGCTCACTCTC        |
| 45235       | 45235 - 45835                  | 601          | GGGAGGAAGGAGGAGAGCTA      | AAACATGCGTGGAGGTCAT         |
| 45717       | 45717 - 46366                  | 649          | CGATATAAATTATGCAAACATGACG | CGACAATCGTGAAGGTTTGAG       |
| 46270       | 46270 - 46923                  | 653          | CTCTCCTCCTTCGACACGAT      | ATCCGCACCACACTACATCA        |
| 46852       | 46852 - 47504                  | 652          | GACGGTGAGCGAAGAAGG        | CGAGGGGAGTAGTATACATCTAAAGC  |
| 47384       | 47384 - 48042                  | 658          | TCGTGCGGATGATAACCATA      | CCAAGTCTTGCTGGGTTGTT        |
| 47949       | 47949 - 48639                  | 690          | CAGCGGAGGGTGAAACATAC      | TACCGGACGACTGGACCTAC        |
| 48520       | 48520 - 49204                  | 684          | TTGGTTTCTCCACCTCTTG       | GTCGAGGAGGCCGAACCTT         |
| 49081       | 49081 - 49742                  | 661          | CTACGCCCTCGGCCTCTT        | GGCCGTAAGACCCCTGACC         |
| 87788       | 87788 - 88452                  | 664          | CAGATTGTTGCGGGGTTACTG     | GAGAAACACACCGGTTGAAAA       |





**Supplementary Table 7| Information and annotation on amino acid sequences showing similarities to QSD1.**

| Abbreviation | Species                        | ID                                      | Annotation                                                         | Position             | Remark              |
|--------------|--------------------------------|-----------------------------------------|--------------------------------------------------------------------|----------------------|---------------------|
| Hv1          | <i>Hordeum vulgare</i>         | gi 326520203 dbj BAK04026.1             | predicted protein                                                  | chromosome 5HL       | QSD1                |
| Hv2          | <i>Hordeum vulgare</i>         | gi 326525020 dbj BAK07780.1             | predicted protein                                                  | chromosome 2HS       |                     |
| Hv3          | <i>Hordeum vulgare</i>         | gi 1703227 sp P52894.1 ALA2_HORVU       | alanine aminotransferase                                           | chromosome 1H?       | AlaAT <sup>24</sup> |
| Hv4          | <i>Hordeum vulgare</i>         | gi 326491065 dbj BAK05632.1             | predicted protein                                                  |                      |                     |
| Hv5part      | <i>Hordeum vulgare</i>         | gi 326495904 dbj BAJ90574.1             | predicted protein partial                                          | chromosome 2H        |                     |
| Os1          | <i>Oryza sativa</i>            | gi 115479309 ref NP_001063248.1         |                                                                    | Os09g0433900         |                     |
| Os2          | <i>Oryza sativa</i>            | gi 115481822 ref NP_001064504.1         |                                                                    | Os10g0390500         |                     |
| Os3          | <i>Oryza sativa</i>            | gi 297610424 ref NP_001064505.2         |                                                                    | Os10g0390600         |                     |
| Os4          | <i>Oryza sativa</i>            | gi 115473371 ref NP_001060284.1         |                                                                    | Os07g0617800         |                     |
| Os5          | <i>Oryza sativa</i>            | gi 115470235 ref NP_001058716.1         |                                                                    | Os07g0108300         |                     |
| Sb1          | <i>Sorghum bicolor</i>         | gi 242050886 ref XP_002463187.1         | hypothetical protein                                               | SORBIDRAFT_02g039340 |                     |
| Sb2          | <i>Sorghum bicolor</i>         | gi 242039815 ref XP_002467302.1         | hypothetical protein                                               | SORBIDRAFT_01g023740 |                     |
| Bd1          | <i>Brachypodium distachyon</i> | gi 357158537 ref XP_003578159.1         | PREDICTED: glutamate-glyoxylate aminotransferase 2-like            |                      |                     |
| Bd2          | <i>Brachypodium distachyon</i> | gi 721610191 ref XP_010235387.1         | PREDICTED: glutamate-glyoxylate aminotransferase 2-like isoform X2 |                      |                     |
| Bd3          | <i>Brachypodium distachyon</i> | gi 357111762 ref XP_003557680.1         | PREDICTED: glutamate-glyoxylate aminotransferase 2                 |                      |                     |
| At1          | <i>Arabidopsis thaliana</i>    | gi 42562119 ref NP_173173.3             | alanine aminotransferase                                           |                      |                     |
| At2          | <i>Arabidopsis thaliana</i>    | gi 14596229 gb AAK68842.1               | alanine aminotransferase-like protein                              |                      |                     |
| Mt1          | <i>Medicago truncatula</i>     | gi 357514319 ref XP_003627448.1 :39-524 | alanine aminotransferase                                           |                      |                     |
| Mt2          | <i>Medicago truncatula</i>     | gi 357485703 ref XP_003613139.1 :9-475  | glutamate-glyoxylate aminotransferase                              |                      |                     |

**Supplementary Table 8| qPCR primers and conditions for expression analysis of *Qsd1/qsd1*.**

| Primer           | Full length/partial cDNAs | Forward sequence (5'-3') | Reverse sequence (5'-3') | Annealing Temp (°C) | Fragment size (bp) |
|------------------|---------------------------|--------------------------|--------------------------|---------------------|--------------------|
| <i>Qsd1</i>      | AK372829                  | AGGACAAGATCGAGGCAATG     | ATAATTTGCAGGGAGCGAAG     | 60                  | 98                 |
| <i>Qsd1/qsd1</i> | AK372829                  | CTCTTTGCCCAACACAAAT      | GAATGCGTTCACCAAGGTCT     | 60                  | 152                |
| <i>HvEF-1α*</i>  | L11740.1                  | GCCAGATCAGCAACGGTTAT     | ATCTTGACGAACCCAGCATC     | 60                  | 120                |

\* <http://www.ncbi.nlm.nih.gov/pubmed/815979>
